# Supplementary material for: Overt Word Reading and Visual Object Naming in Adults with Dyslexia: Electroencephalography Study in Transparent Orthography
Source: MDPI journal article supplement (doi:10.3390/bioengineering11050459), 2024-05-04
Supplement: s1 [file s1]

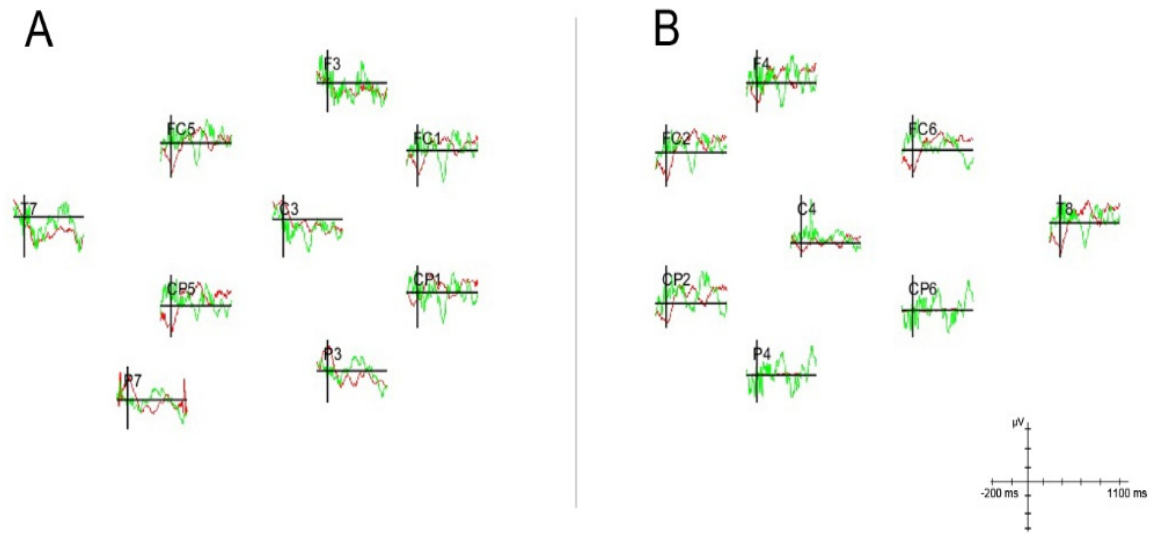

**Figure S3. Grand average ERPs from ROI electrodes in overt object naming task. A)** Grand average ERPs from left ROI electrodes, **B)** Grand average ERPs from right ROI electrodes in overt object naming task averaged separately for control participants (red line) and dyslexic participants (green line).
