# Supplementary material for: Overt Word Reading and Visual Object Naming in Adults with Dyslexia: Electroencephalography Study in Transparent Orthography
Source: MDPI journal article supplement (doi:10.3390/bioengineering11050459), 2024-05-04
Supplement: s1 [file s1]

Supplementary material

**Table S3.** Descriptive means and standard deviations based on observation of amplitudes ( $\mu\text{V}$ ) for different time windows.

| Time window  | Group    | Hemisphere | Word reading |      | Visual object naming |      |
|--------------|----------|------------|--------------|------|----------------------|------|
|              |          |            | M            | sd   | M                    | sd   |
| Pre-lexical  | Control  | Right      | 0.37         | 3.28 | 0.64                 | 2.89 |
|              |          | Left       | -0.43        | 3.68 | -0.64                | 3.90 |
|              | Dyslexia | Right      | 0.29         | 6.95 | 1.17                 | 5.61 |
|              |          | Left       | -0.71        | 3.81 | -0.76                | 4.50 |
| Lexical      | Control  | Right      | 1.08         | 2.54 | 0.78                 | 3.44 |
|              |          | Left       | -0.36        | 2.96 | -0.38                | 3.90 |
|              | Dyslexia | Right      | 0.36         | 4.96 | 0.08                 | 6.64 |
|              |          | Left       | 0.25         | 4.19 | -0.63                | 4.17 |
| Post-lexical | Control  | Right      | 1.17         | 3.21 | 1.07                 | 2.20 |
|              |          | Left       | -0.44        | 3.93 | -0.32                | 2.81 |
|              | Dyslexia | Right      | 0.73         | 3.53 | 0.08                 | 3.98 |
|              |          | Left       | -0.19        | 2.69 | -0.69                | 2.68 |
