# Supplementary material for: Overt Word Reading and Visual Object Naming in Adults with Dyslexia: Electroencephalography Study in Transparent Orthography
Source: MDPI journal article supplement (doi:10.3390/bioengineering11050459), 2024-05-04
Supplement: s1 [file s1]

Supplementary material

Table S1. Naming blocks (picture stimuli)

1. Block

|                                                                                     |                                                                                     |                                                                                       |                                                                                         |
|-------------------------------------------------------------------------------------|-------------------------------------------------------------------------------------|---------------------------------------------------------------------------------------|-----------------------------------------------------------------------------------------|
|  * |    |     |  *   |
|    |  * |      |  *   |
|   |   |  * |  *  |
|  |  |   |  * |

2.. Block

|                                                                                     |                                                                                       |                                                                                        |                                                                                       |
|-------------------------------------------------------------------------------------|---------------------------------------------------------------------------------------|----------------------------------------------------------------------------------------|---------------------------------------------------------------------------------------|
|  |  * |     |  |
|  |    |  * |  |

|                                                                                   |                                                                                   |                                                                                    |                                                                                     |
|-----------------------------------------------------------------------------------|-----------------------------------------------------------------------------------|------------------------------------------------------------------------------------|-------------------------------------------------------------------------------------|
|  |  |  |  |
|  |  |  |  |

### 3.Block

|                                                                                     |                                                                                     |                                                                                      |                                                                                       |
|-------------------------------------------------------------------------------------|-------------------------------------------------------------------------------------|--------------------------------------------------------------------------------------|---------------------------------------------------------------------------------------|
| 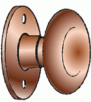   |    |    |    |
|  |  |  |  |
|  |  |  |  |
|  |  |  |  |

#### 4. Block

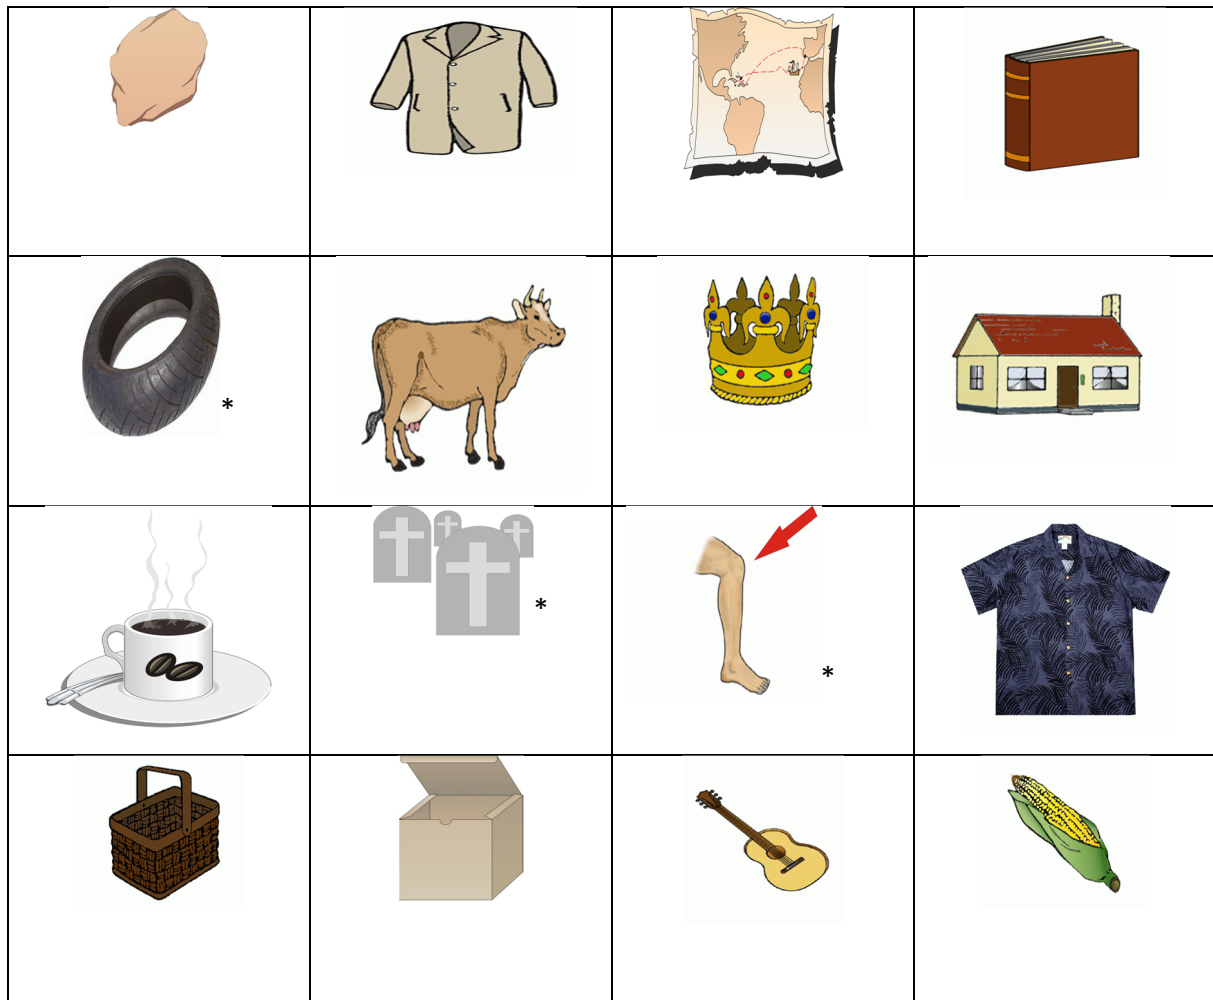

Forty five picture stimuli were chosen from Revisiting Snodgrass and Vanderwart's pictorial object set [108] and nineteen\* picture stimuli from Corel Gallery™Magic [109]. Pictures shared same names as words provided in Supplementary Table 2.

*\* Pictures stimuli from Corel Gallery™Magic [109]*
