# Supplementary material for: Overt Word Reading and Visual Object Naming in Adults with Dyslexia: Electroencephalography Study in Transparent Orthography
Source: MDPI journal article supplement (doi:10.3390/bioengineering11050459), 2024-05-04
Supplement: s1 [file s1]

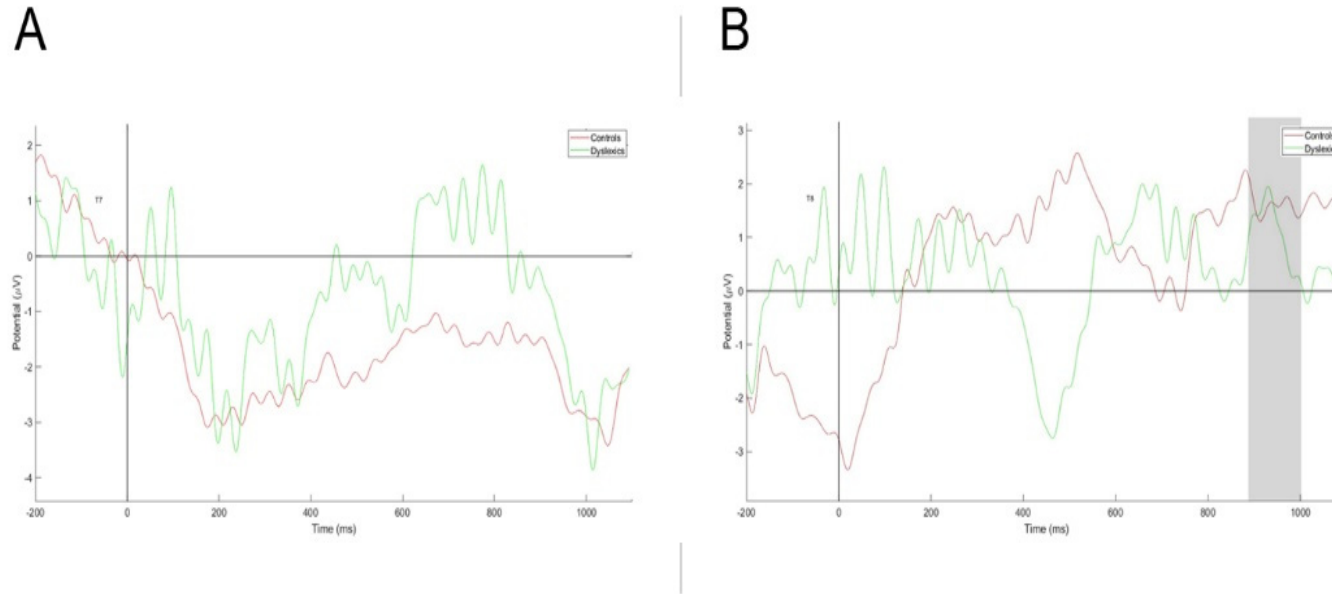

**Figure S4. Schematic view of two ROI electrodes in overt object naming task.** A) T7 electrode (left hemisphere), B) T8 electrode (right hemisphere) showing a significant effect at 900-1000 ms after picture presentation (grey area) at electrode T8 in adult PDs compared to HCs in post-lexical naming window (900-1000ms)
