# Supplementary material for: Overt Word Reading and Visual Object Naming in Adults with Dyslexia: Electroencephalography Study in Transparent Orthography
Source: MDPI journal article supplement (doi:10.3390/bioengineering11050459), 2024-05-04
Supplement: s1 [file s1]

## Supplementary material

**Table S2. Reading blocks stimuli**

### 1. Block reading words

|     | <b>Word<br/>(Croatian)</b> | <i>Translated<br/>to English</i> | <b>Letter<br/>number</b> | <b>Syllable<br/>number</b> | <b>Absolute<br/>frequency</b> | <b>Relative<br/>Frequency</b> |
|-----|----------------------------|----------------------------------|--------------------------|----------------------------|-------------------------------|-------------------------------|
| 1.  | bager                      | <i>excavator</i>                 | 5                        | 2                          | 569                           | 0,0001                        |
| 2.  | biser                      | <i>pearl</i>                     | 5                        | 2                          | 569                           | 0,0001                        |
| 3.  | biljar                     | <i>billiards</i>                 | 5                        | 2                          | 569                           | 0,0001                        |
| 4.  | badem                      | <i>almond</i>                    | 5                        | 2                          | 568                           | 0,0002                        |
| 5.  | baklja                     | <i>torch</i>                     | 5                        | 2                          | 562                           | 0,0008                        |
| 6.  | bokal                      | <i>carafe</i>                    | 5                        | 2                          | 567                           | 0,0003                        |
| 7.  | barjak                     | <i>banner</i>                    | 6                        | 2                          | 553                           | 0,0017                        |
| 8.  | bambus                     | <i>bamboo</i>                    | 6                        | 2                          | 568                           | 0,0002                        |
| 9.  | baraka                     | <i>shack</i>                     | 6                        | 3                          | 562                           | 0,0008                        |
| 10. | banana                     | <i>banana</i>                    | 6                        | 3                          | 565                           | 0,0005                        |
| 11. | bakalar                    | <i>cod</i>                       | 7                        | 3                          | 567                           | 0,0003                        |
| 12. | bundeva                    | <i>pumpkin</i>                   | 7                        | 3                          | 567                           | 0,0003                        |
| 13. | dijamant                   | <i>diamond</i>                   | 8                        | 3                          | 560                           | 0,0010                        |
| 14. | bubamara                   | <i>ladybug</i>                   | 8                        | 4                          | 567                           | 0,0003                        |
| 15. | dalekozor                  | <i>binoculars</i>                | 8                        | 4                          | 562                           | 0,0008                        |
| 16. | baterija                   | <i>battery</i>                   | 8                        | 4                          | 566                           | 0,0004                        |

## 2. Block reading words

|     | <b>Word<br/>(Croatian)</b> | <i>Translated<br/>to English</i> | <b>Letter<br/>number</b> | <b>Syllable<br/>number</b> | <b>Absolute<br/>frequency</b> | <b>Relative<br/>Frequency</b> |
|-----|----------------------------|----------------------------------|--------------------------|----------------------------|-------------------------------|-------------------------------|
| 1.  | banka                      | <i>bank</i>                      | 5                        | 2                          | 444                           | 0,0126                        |
| 2.  | bačva                      | <i>barrel</i>                    | 5                        | 2                          | 538                           | 0,0032                        |
| 3.  | bomba                      | <i>bomb</i>                      | 5                        | 2                          | 493                           | 0,0077                        |
| 4.  | balet                      | <i>ballet</i>                    | 5                        | 2                          | 547                           | 0,0023                        |
| 5.  | balon                      | <i>balloon</i>                   | 5                        | 2                          | 559                           | 0,0011                        |
| 6.  | brada                      | <i>beard</i>                     | 5                        | 2                          | 511                           | 0,0059                        |
| 7.  | brava                      | <i>lock</i>                      | 5                        | 2                          | 549                           | 0,0021                        |
| 8.  | bazen                      | <i>pool</i>                      | 5                        | 2                          | 550                           | 0,0020                        |
| 9.  | bubanj                     | <i>drum</i>                      | 5                        | 2                          | 535                           | 0,0035                        |
| 10. | bunar                      | <i>well</i>                      | 5                        | 2                          | 530                           | 0,0040                        |
| 11. | balkon                     | <i>balcony</i>                   | 6                        | 2                          | 541                           | 0,0029                        |
| 12. | dječak                     | <i>boy</i>                       | 6                        | 2                          | 415                           | 0,0155                        |
| 13. | dimnjak                    | <i>chimney</i>                   | 6                        | 2                          | 537                           | 0,0033                        |
| 14. | dvorac                     | <i>castle</i>                    | 6                        | 2                          | 553                           | 0,0017                        |
| 15. | bombon                     | <i>candy</i>                     | 6                        | 2                          | 560                           | 0,0010                        |
| 16. | bolnica                    | <i>hospital</i>                  | 7                        | 3                          | 462                           | 0,0108                        |

### 3. Block of words

|     | <b>Word<br/>(Croatian)</b> | <i>Translated to<br/>English</i> | <b>Letter<br/>number</b> | <b>Syllable<br/>number</b> | <b>Absolute<br/>frequency</b> | <b>Relative<br/>Frequency</b> |
|-----|----------------------------|----------------------------------|--------------------------|----------------------------|-------------------------------|-------------------------------|
| 1.  | kvaka                      | <i>doorknob</i>                  | 5                        | 2                          | 556                           | 0,0014                        |
| 2.  | guska                      | <i>goose</i>                     | 5                        | 2                          | 560                           | 0,0010                        |
| 3.  | klaun                      | <i>clown</i>                     | 5                        | 2                          | 568                           | 0,0002                        |
| 4.  | kavez                      | <i>cage</i>                      | 5                        | 2                          | 558                           | 0,0012                        |
| 5.  | kokos                      | <i>coconut</i>                   | 5                        | 2                          | 568                           | 0,0002                        |
| 6.  | gusar                      | <i>pirate</i>                    | 5                        | 2                          | 566                           | 0,0004                        |
| 7.  | globus                     | <i>globe</i>                     | 6                        | 2                          | 558                           | 0,0012                        |
| 8.  | kaseta                     | <i>tape</i>                      | 6                        | 3                          | 569                           | 0,0001                        |
| 9.  | kamera                     | <i>camera</i>                    | 6                        | 3                          | 568                           | 0,0002                        |
| 10. | kaciga                     | <i>helmet</i>                    | 6                        | 3                          | 559                           | 0,0011                        |
| 11. | kormilo                    | <i>rudder</i>                    | 7                        | 3                          | 565                           | 0,0005                        |
| 12. | kornjača                   | <i>turtle</i>                    | 7                        | 3                          | 559                           | 0,0011                        |
| 13. | krokodil                   | <i>crocodile</i>                 | 8                        | 3                          | 557                           | 0,0013                        |
| 14. | gramofon                   | <i>record player</i>             | 8                        | 3                          | 559                           | 0,0011                        |
| 15. | galerija                   | <i>gallery</i>                   | 8                        | 4                          | 551                           | 0,0019                        |
| 16. | kosilica                   | <i>lawnmower</i>                 | 8                        | 4                          | 569                           | 0,0001                        |

#### 4. Block of words

|     | <b>Word<br/>(Croatian)</b> | <i>Translated to<br/>English</i> | <b>Letter<br/>number</b> | <b>Syllable<br/>number</b> | <b>Absolute<br/>frequency</b> | <b>Relative<br/>Frequency</b> |
|-----|----------------------------|----------------------------------|--------------------------|----------------------------|-------------------------------|-------------------------------|
| 1.  | Kamen                      | <i>stone</i>                     | 5                        | 2                          | 284                           | 0,0295                        |
| 2.  | Kaput                      | <i>coat</i>                      | 5                        | 2                          | 501                           | 0,0069                        |
| 3.  | Karta                      | <i>map</i>                       | 5                        | 2                          | 453                           | 0,0117                        |
| 4.  | Knjiga                     | <i>book</i>                      | 5                        | 2                          | 323                           | 0,0248                        |
| 5.  | Guma                       | <i>tire</i>                      | 5                        | 2                          | 535                           | 0,0035                        |
| 6.  | Krava                      | <i>cow</i>                       | 5                        | 2                          | 477                           | 0,0093                        |
| 7.  | Kruna                      | <i>crown</i>                     | 5                        | 2                          | 518                           | 0,0052                        |
| 8.  | Kuća                       | <i>house</i>                     | 5                        | 2                          | 99                            | 0,0937                        |
| 9.  | Kava                       | <i>coffee</i>                    | 5                        | 2                          | 512                           | 0,0058                        |
| 10. | Groblje                    | <i>cemetery</i>                  | 5                        | 2                          | 501                           | 0,0069                        |
| 11. | Koljeno                    | <i>knee</i>                      | 6                        | 3                          | 449                           | 0,0021                        |
| 12. | Košulja                    | <i>shirt</i>                     | 6                        | 3                          | 470                           | 0,0100                        |
| 13. | Kutija                     | <i>box</i>                       | 6                        | 3                          | 479                           | 0,0091                        |
| 14. | Gitara                     | <i>guitar</i>                    | 6                        | 3                          | 547                           | 0,0023                        |
| 15. | Košara                     | <i>basket</i>                    | 6                        | 3                          | 543                           | 0,0027                        |
| 16. | Kukuruz                    | <i>corn</i>                      | 7                        | 3                          | 521                           | 0,0049                        |
