# Supplementary material for: Overt Word Reading and Visual Object Naming in Adults with Dyslexia: Electroencephalography Study in Transparent Orthography
Source: MDPI journal article supplement (doi:10.3390/bioengineering11050459), 2024-05-04
Supplement: s1 [file s1]

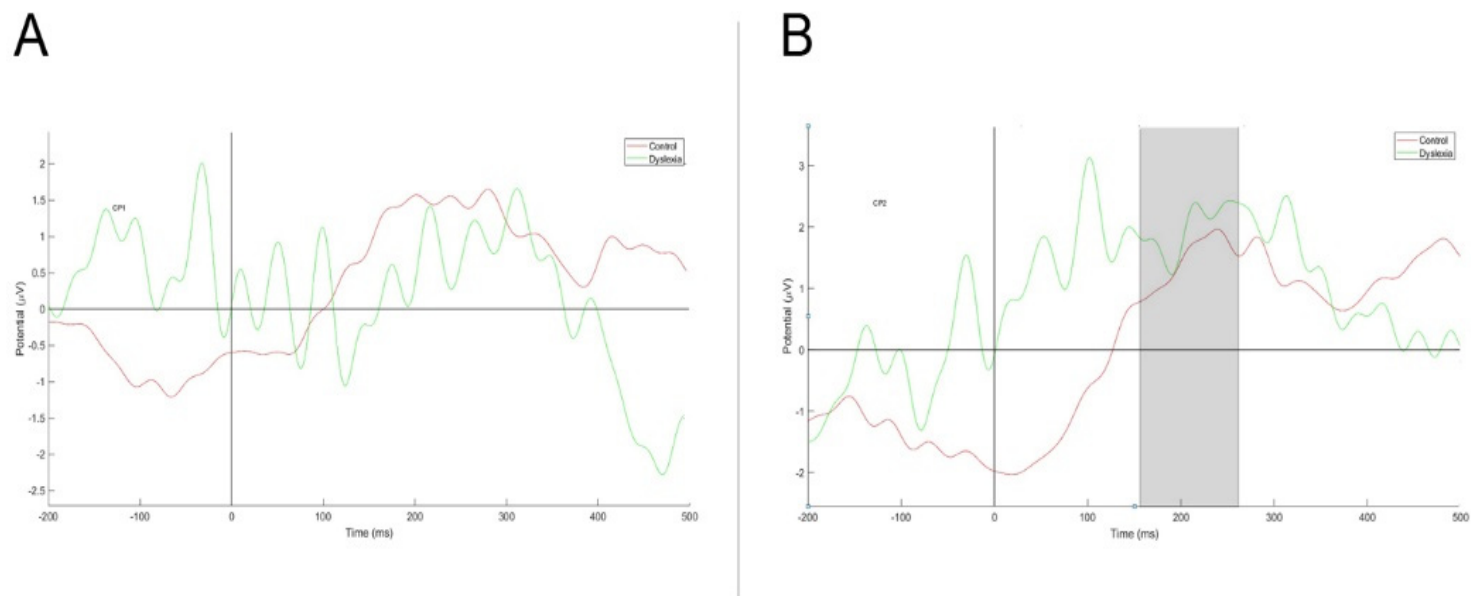

**Figure S2. Schematic view of two ROI electrodes in overt reading task.** A) CP1 electrode (left hemisphere), B) CP2 electrode (right hemisphere) showing a significant effect at 160-260 ms after picture presentation (gray area) at electrode CP2 in adult PDs compared to HCs in pre-lexical reading window (160-260 ms)
